# Supplementary material
Source: PubMed Central journal article supplement (PMC5528922)

# Supplemental Figure 1

A

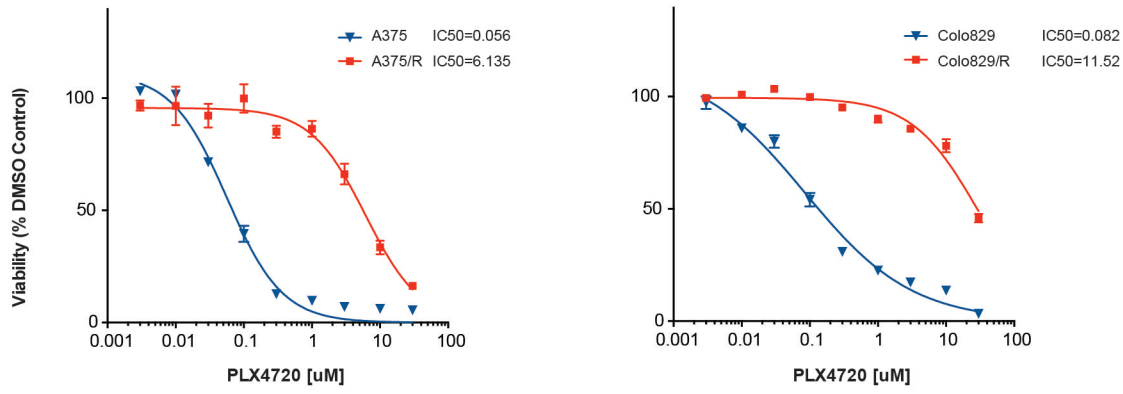

B

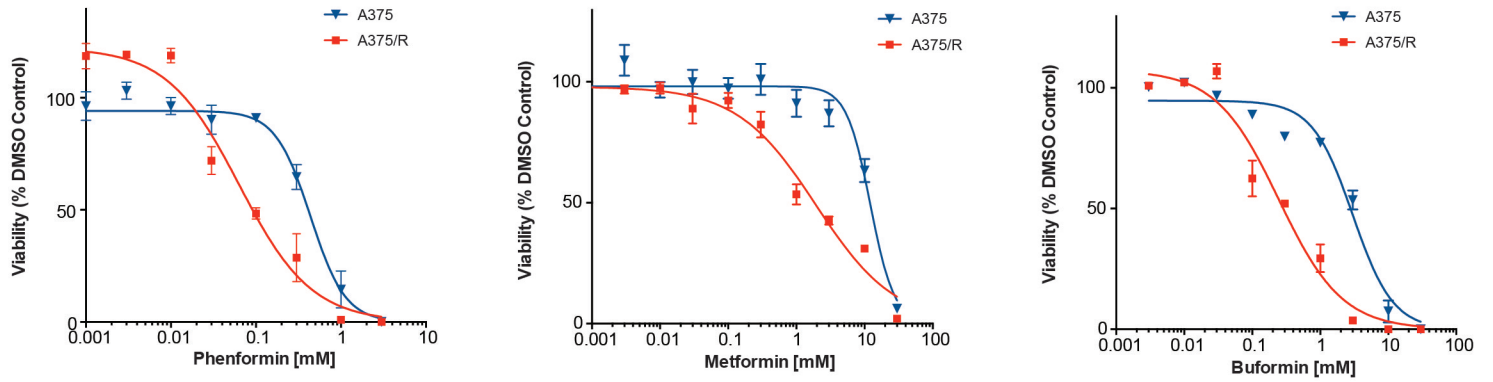

C

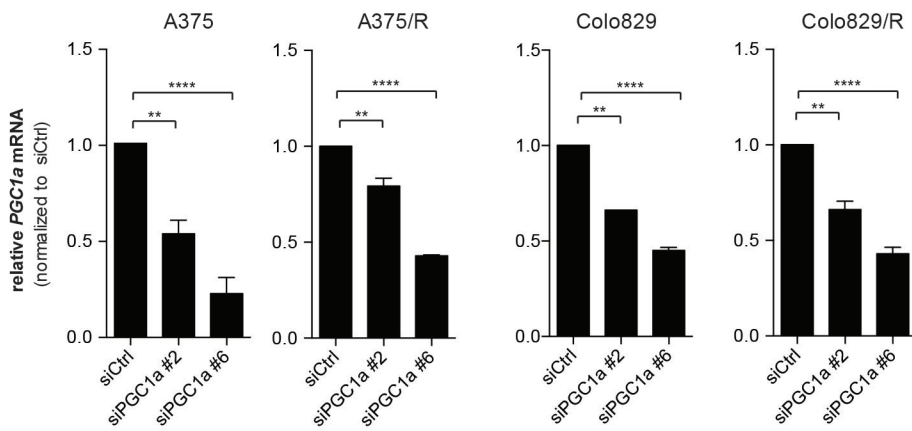

D

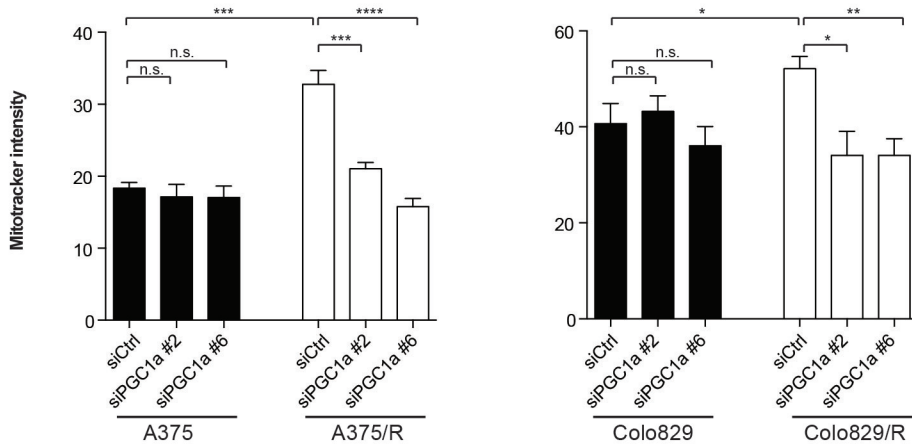

# Supplemental Figure 2

A

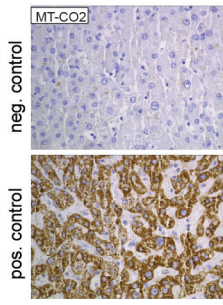

B

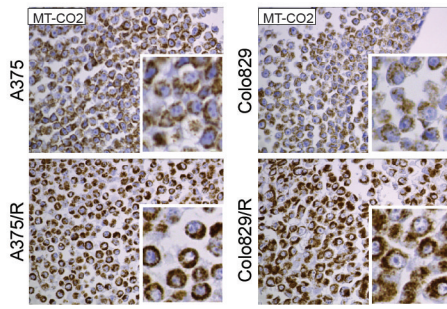

C

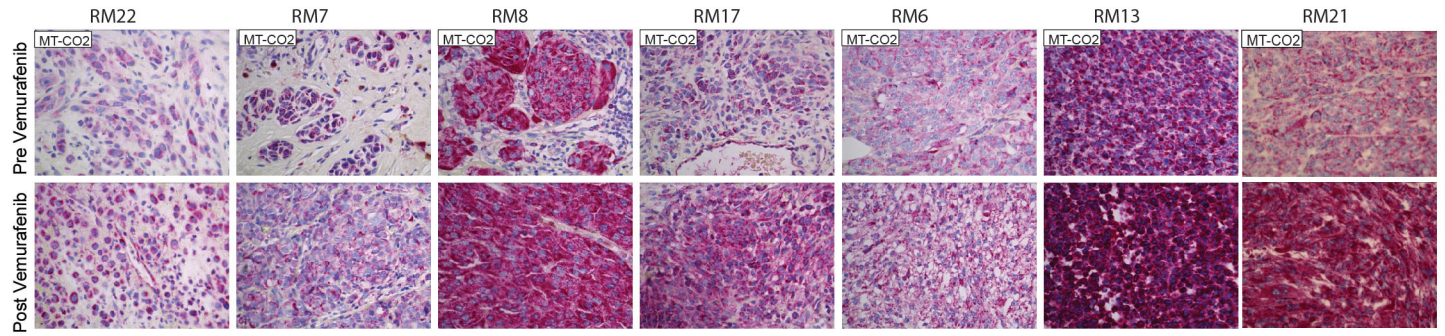

D

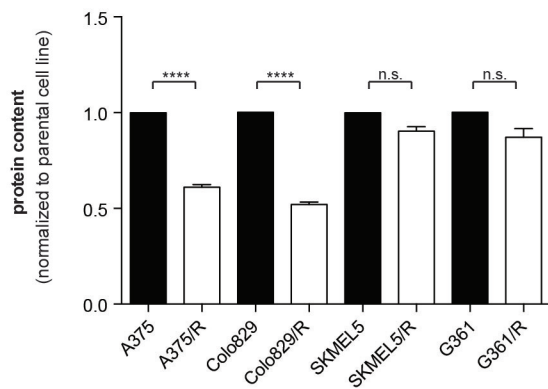

E

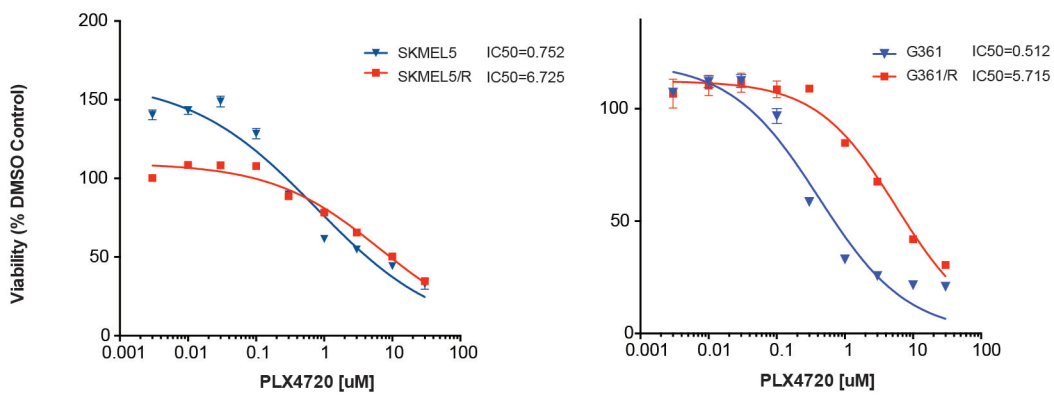

# Supplemental Figure 3

A

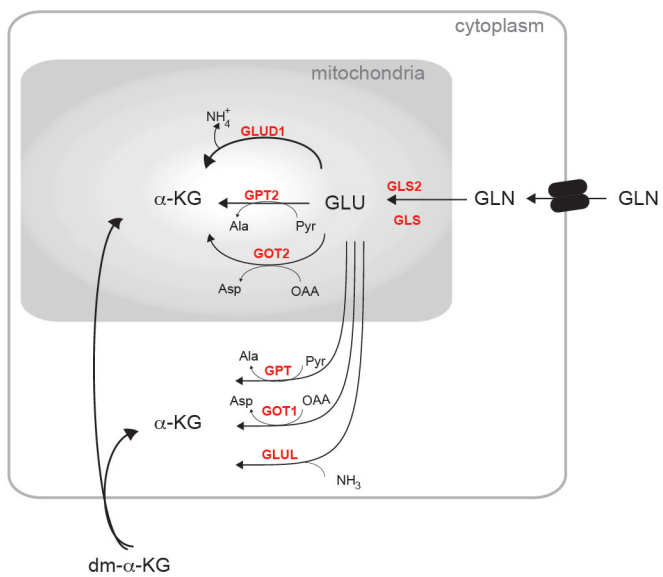

B

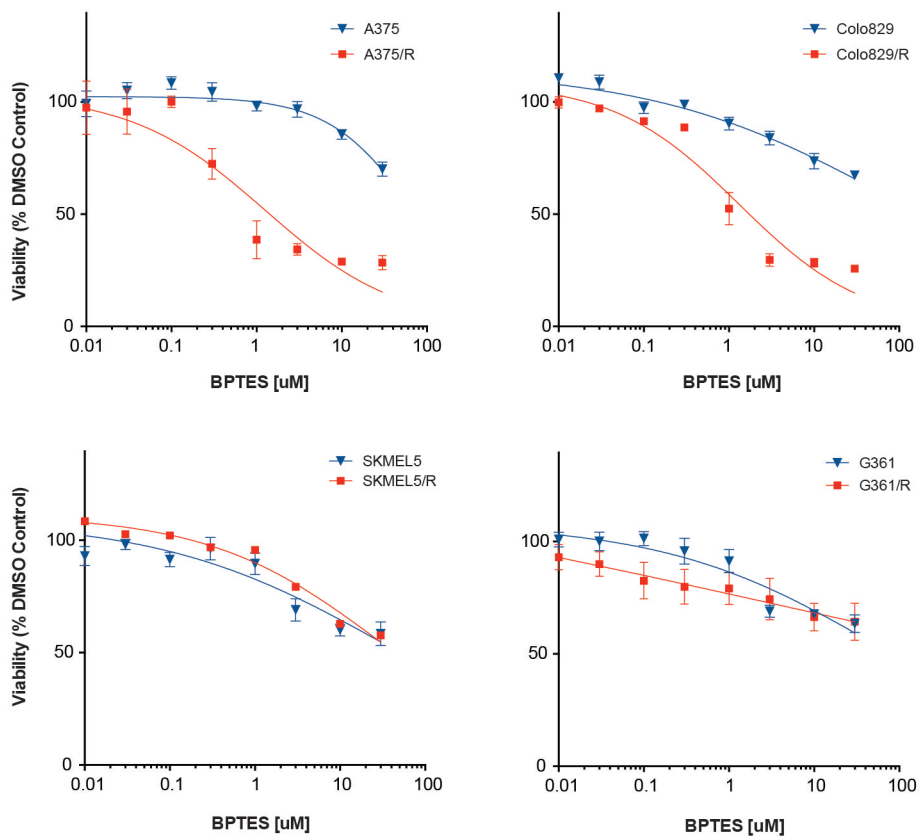

Supplement: MOL2-10-073-s001.pdf [file MOL2-10-073-s001.pdf]
