# Supplementary material
Source: PubMed Central journal article supplement (PMC5528922)
Supplement: MOL2-10-073-s002.pdf [file MOL2-10-073-s002.pdf]

Supplemental Table 1

| <b>Cell line</b> | <b>ATCC number</b> | <b>Disease</b>     | <b>Sex</b> | <b>Tissue</b> | <b>Source</b> | <b>Authentication method</b> | <b>Date of authentication</b> | <b>Used after authentication (per frozen vial)</b> |
|------------------|--------------------|--------------------|------------|---------------|---------------|------------------------------|-------------------------------|----------------------------------------------------|
| A375             | CRL-1619           | malignant melanoma | F          | skin          | ATCC          | STR                          | 25.03.2013                    | < 3 months                                         |
| A375/R           | CRL-1619           | malignant melanoma | F          | skin          | ATCC          | STR                          | 25.03.2013                    | < 3 months                                         |
| Colo829          | CRL-1974           | melanoma           | M          | skin          | ATCC          | STR                          | 13.03.2013                    | < 3 months                                         |
| Colo829/R        | CRL-1974           | melanoma           | M          | skin          | ATCC          | STR                          | 13.03.2013                    | < 3 months                                         |
| G361             | CRL-1424           | malignant melanoma | M          | skin          | ATCC          | STR                          | 06.11.2014                    | < 3 months                                         |
| G361/R           | CRL-1424           | malignant melanoma | M          | skin          | ATCC          | STR                          | 06.11.2014                    | < 3 months                                         |
| SKMEL5           | HTB-70             | malignant melanoma | F          | skin          | ATCC          | STR                          | 06.11.2014                    | < 3 months                                         |
| SKMEL5/R         | HTB-70             | malignant melanoma | F          | skin          | ATCC          | STR                          | 06.11.2014                    | < 3 months                                         |
